# Supplementary material for: The Acinetobacter baumannii Mla system and glycerophospholipid transport to the outer membrane
Source: eLife journal article supplement (doi:10.7554/elife.40171), 2019-01-14
Supplement: supp [file elife-40171-supp-v1.zip]

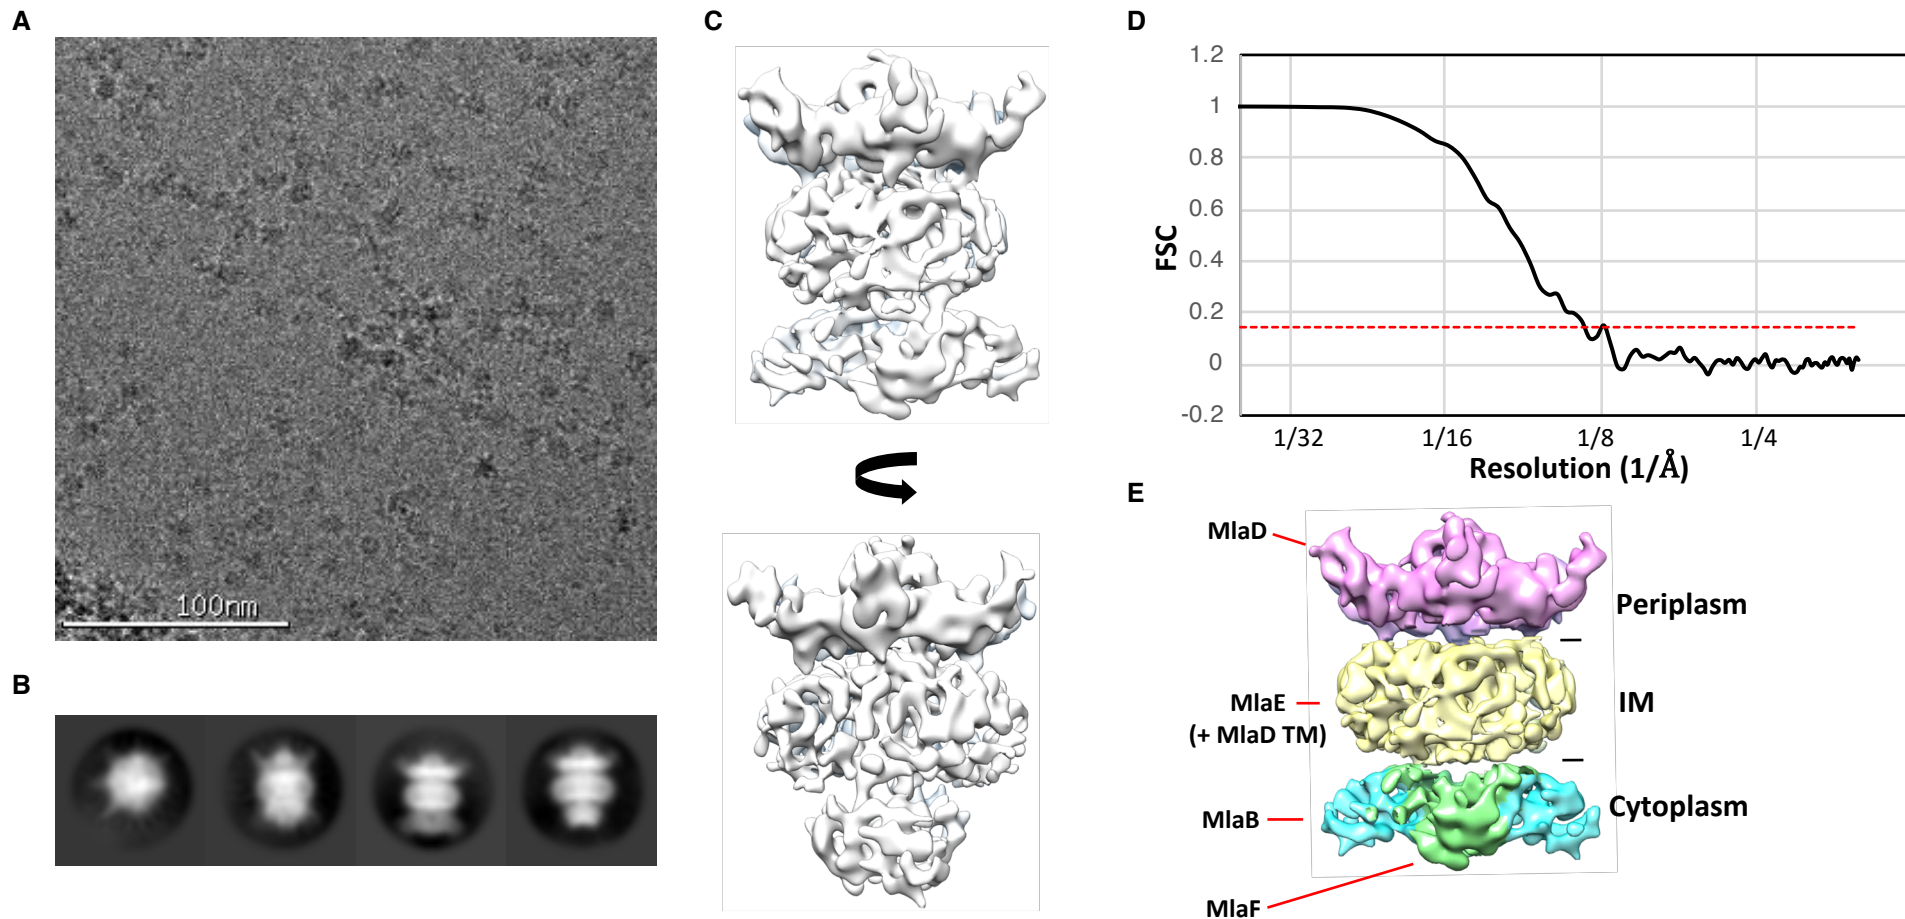

**Figure 2 - figure supplement 2. Cryo-EM structure of the abMlaBDEF complex.** (A) Representative electron micrograph region of frozen-hydrated MlaBDEF complex. The scale bar is in white at the bottom. (B) Representative reference-free 2D class averages of abMlaBDEF, generated using Relion, illustrating the various views observed. (C) Cryo-EM map of the Gpt complex, shown in two orientations corresponding to the two last classes shown in B. (D) The FSC curve for the MlaBDEF structure is shown in black, with the gold-standard resolution definition of 0.143% indicated with a red dotted line. The nominal resolution for this structure is 8.7 Å. (E) The regions of density attributed to the periplasmic domain of MlaD, the TM domains of MlaD and MlaE, and to MlaB and MlaF are in pink, yellow, cyan and green respectively.
