# Supplementary material for: The Acinetobacter baumannii Mla system and glycerophospholipid transport to the outer membrane
Source: eLife journal article supplement (doi:10.7554/elife.40171), 2019-01-14
Supplement: supp [file elife-40171-supp-v1.zip]

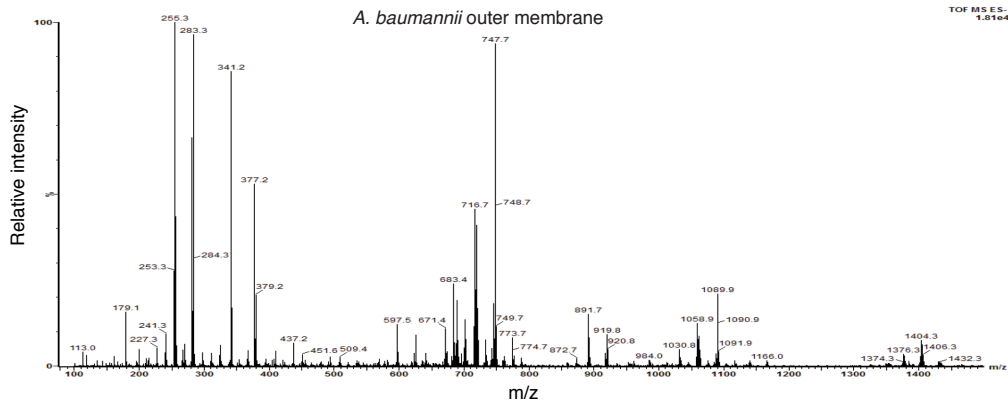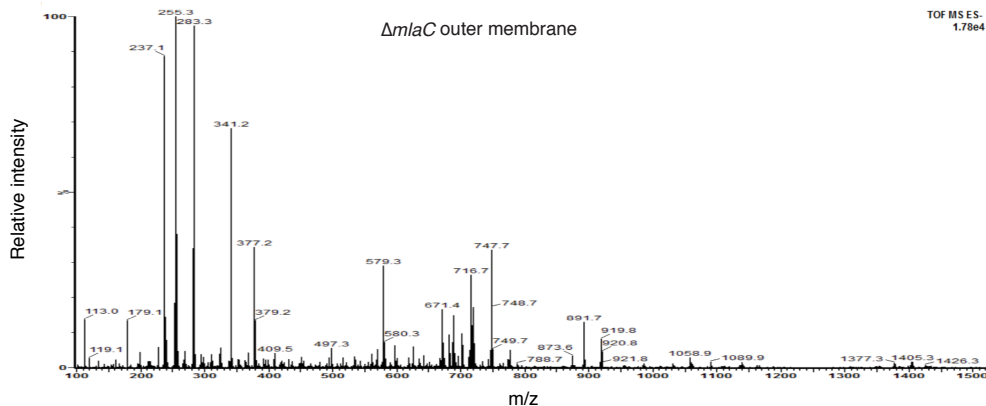

**Figure 4 - figure supplement 2. Deletion of *mlaC* results in a reduction in levels of outer membrane glycerophospholipids.** Total ion scan of isolated outer membranes of *A. baumannii* and  $\Delta mlaC$ . Typical membrane glycerophospholipids fall within the m/z range of 600-1500.
