# Supplementary material for: The Acinetobacter baumannii Mla system and glycerophospholipid transport to the outer membrane
Source: eLife journal article supplement (doi:10.7554/elife.40171), 2019-01-14
Supplement: supp [file elife-40171-supp-v1.zip]

Archive with 15 entries (15 files):
- elife_poa_e40171_Figure_5_figure_supplement_2.pdf
- elife_poa_e40171_Figure_3_figure_supplement_1.pdf
- elife_poa_e40171_Figure_4_figure_supplement_2.pdf
- elife_poa_e40171_Figure_5_figure_supplement_1.pdf
- elife_poa_e40171_Figure_4_figure_supplement_1.pdf
- elife_poa_e40171_Figure_2_figure_supplement_1.pdf
- elife_poa_e40171_Figure_1_figure_supplement_1.pdf
- elife_poa_e40171_Figure_2_figure_supplement_3.pdf
- elife_poa_e40171_Figure_2_figure_supplement_4.pdf
- elife_poa_e40171_Supplementary_File_2.xlsx
- elife_poa_e40171_Figure_5_figure_supplement_3.pdf
- elife_poa_e40171_Figure_1_figure_supplement_2.pdf
- elife_poa_e40171_Transparent_Reporting_File.pdf
- elife_poa_e40171_Figure_2_figure_supplement_2.pdf
- elife_poa_e40171_Supplementary_File_1.xlsx
