# Supplementary material for: The Acinetobacter baumannii Mla system and glycerophospholipid transport to the outer membrane
Source: eLife journal article supplement (doi:10.7554/elife.40171), 2019-01-14
Supplement: supp [file elife-40171-supp-v1.zip › elife_poa_e40171_Figure_1_figure_supplement_1.pdf]

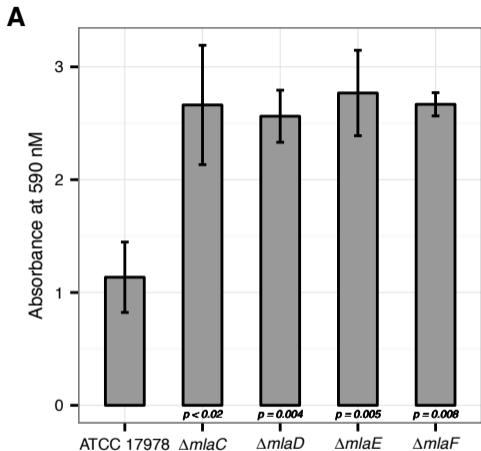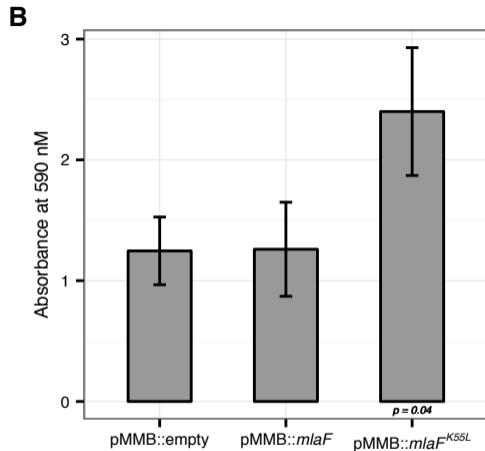

**Figure 1 - figure supplement 1. Disruption of the Mla system leads to an increase in exopolysaccharide production. (A)** Quantification of crystal violet staining from *mla* deletion mutants. Error bars represent  $\pm$  s.d. for biological replicates ( $n = 3$ ). **(B)** Quantification of crystal violet staining following plasmid expression of MlaF compared to its dominant negative version, MlaF<sup>K55L</sup>. Error bars represent  $\pm$  s.d. for biological replicates ( $n = 3$ ).
