# Supplementary material for: The Acinetobacter baumannii Mla system and glycerophospholipid transport to the outer membrane
Source: eLife journal article supplement (doi:10.7554/elife.40171), 2019-01-14
Supplement: supp [file elife-40171-supp-v1.zip › elife_poa_e40171_Figure_1_figure_supplement_2.pdf]

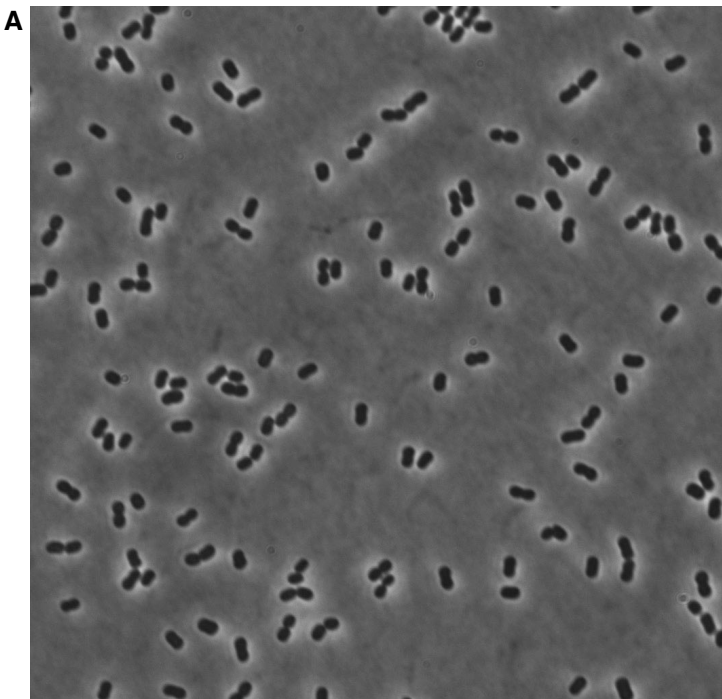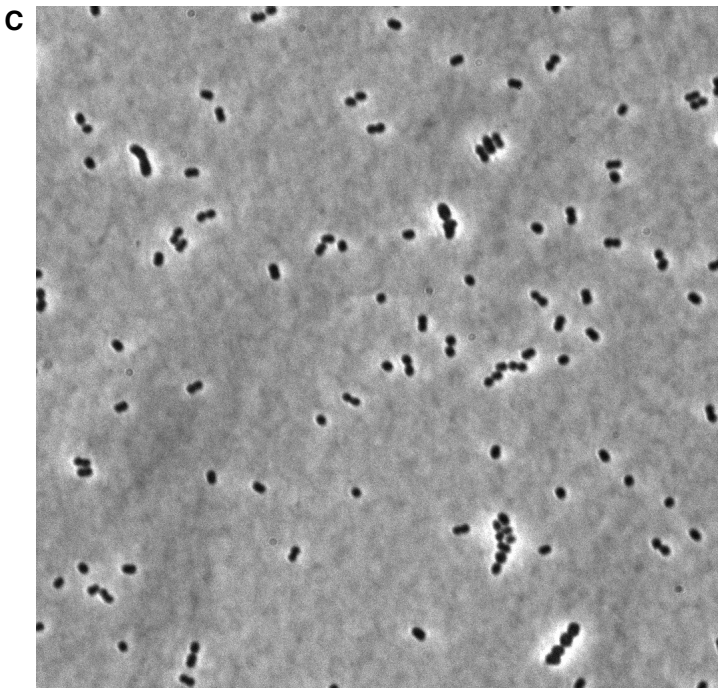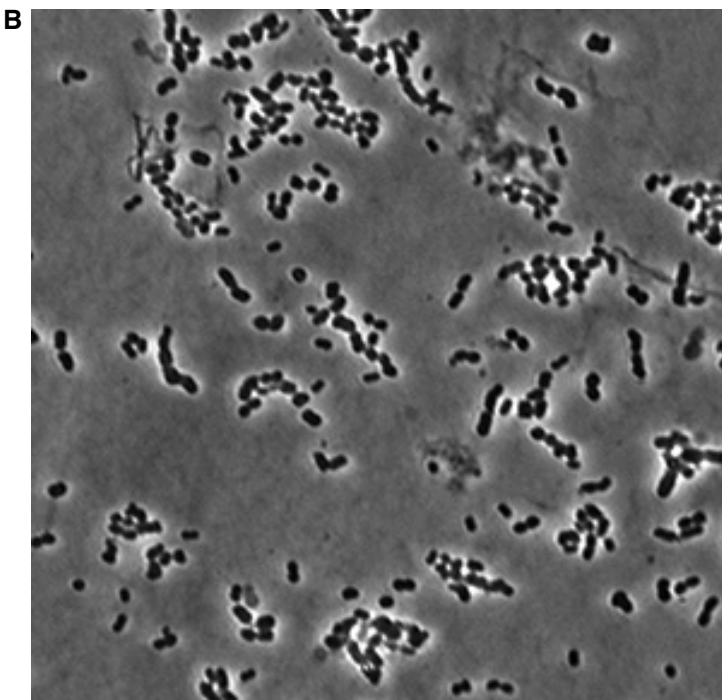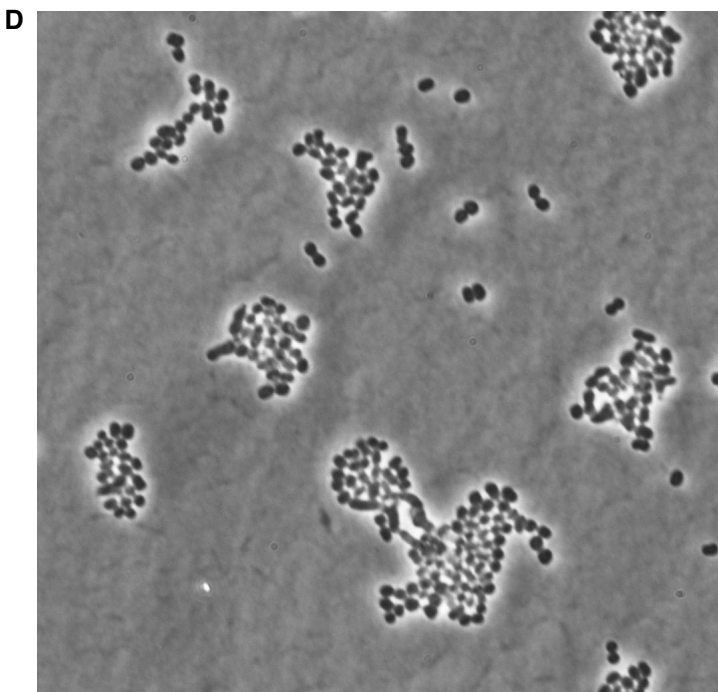

**Figure 1 - figure supplement 2. Phase microscopy images of wild type and *mla* mutant *A. baumannii*.** Images were collected from cultures grown to mid-log (OD600 0.4-0.6) growth phase from wild type (A), *mlaA* (B), *mlaC* (C), and *mlaF* (D) deletion mutants of *A. baumannii*.
