# Supplementary material for: The Acinetobacter baumannii Mla system and glycerophospholipid transport to the outer membrane
Source: eLife journal article supplement (doi:10.7554/elife.40171), 2019-01-14
Supplement: supp [file elife-40171-supp-v1.zip › elife_poa_e40171_Figure_2_figure_supplement_1.pdf]

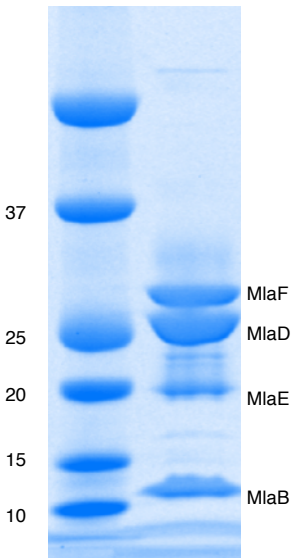

**Figure 2 - figure supplement 1. Mla components copurify following protein expression.** SDS-PAGE analysis of proteins copurified with hexahistidine-tagged MlaB (-His6). Band identities were assigned based on MS.
