# Supplementary material for: The Acinetobacter baumannii Mla system and glycerophospholipid transport to the outer membrane
Source: eLife journal article supplement (doi:10.7554/elife.40171), 2019-01-14
Supplement: supp [file elife-40171-supp-v1.zip › elife_poa_e40171_Figure_2_figure_supplement_4.pdf]

**A**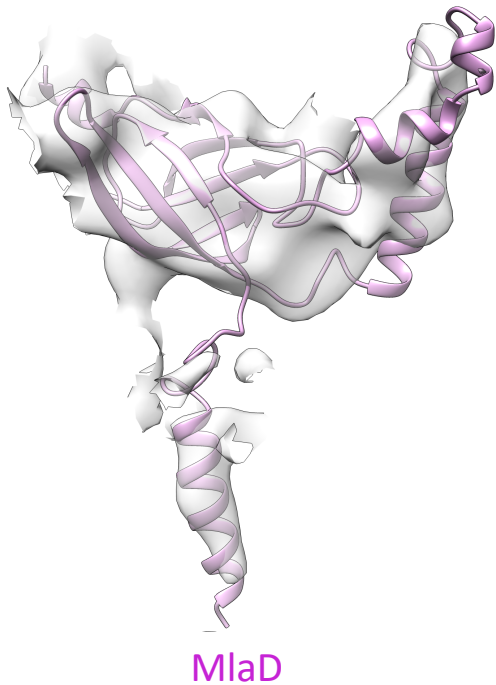**B**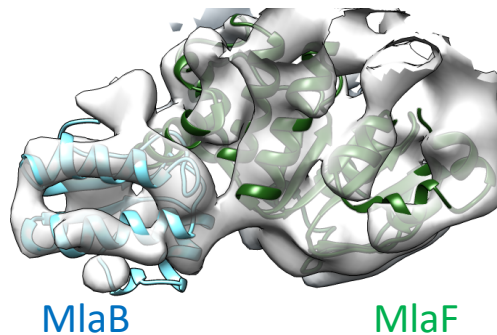**C**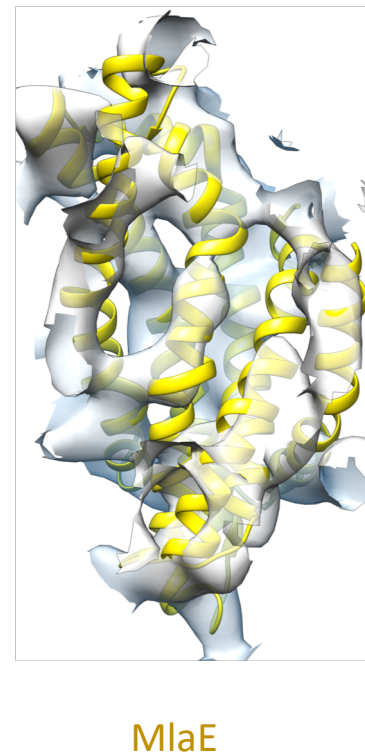

**Figure 2 - figure supplement 4. Close-up view of the MlaB, MlaD, MlaE and MlaF models in the abMlaBDEF cryo-EM map. (A)** Region of the density corresponding to a MlaD monomer, with the corresponding atomic model in magenta. The density of the N-terminal helix is well resolved, as well as that of the *A. baumannii*-specific insert. **(B)** Region of the density corresponding to a MlaF-MlaB hetero-dimer, with the corresponding atomic models in green and cyan respectively, shown from two different angles. Density for helices are well defined for most of the model. **(C)** Region of the density corresponding to a MlaE monomer, with the corresponding atomic model in yellow.
