# Supplementary material for: The Acinetobacter baumannii Mla system and glycerophospholipid transport to the outer membrane
Source: eLife journal article supplement (doi:10.7554/elife.40171), 2019-01-14
Supplement: supp [file elife-40171-supp-v1.zip › elife_poa_e40171_Figure_3_figure_supplement_1.pdf]

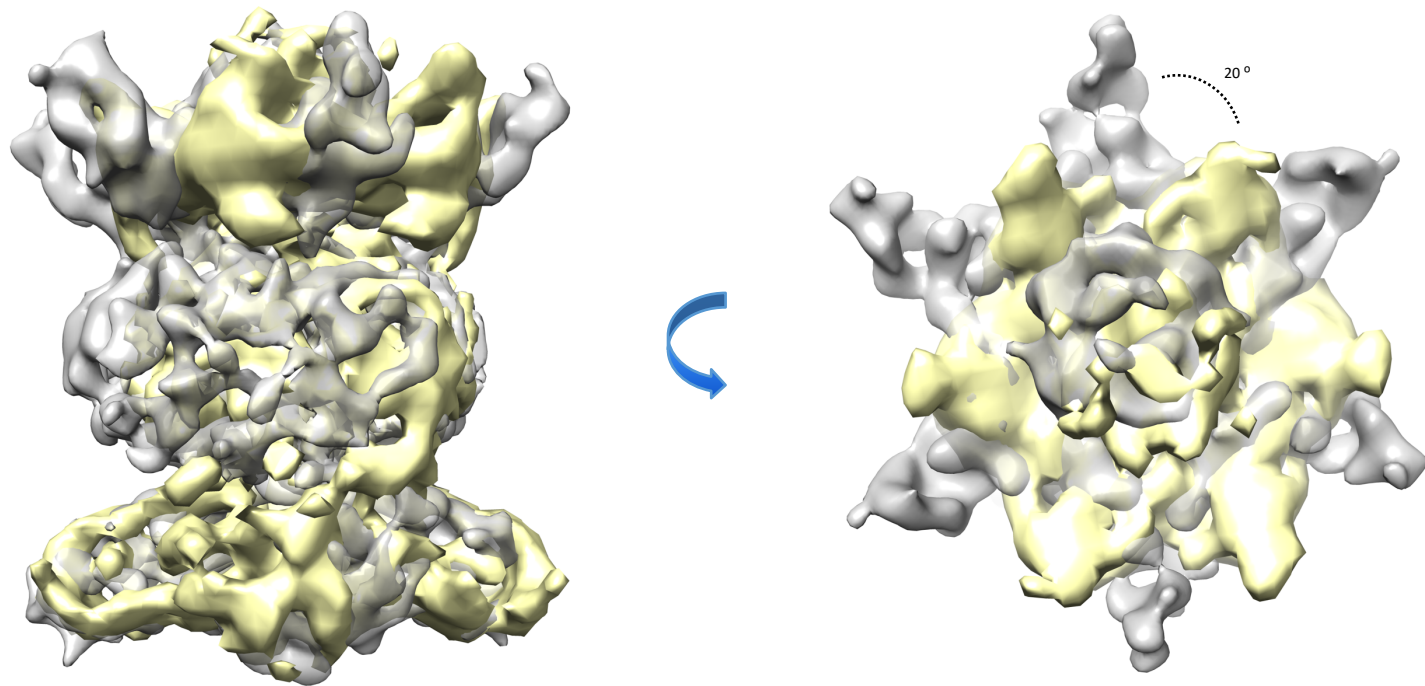

**Figure 3 - figure supplement 1. Comparison of the MlaBDEF<sub>ab</sub> and MlaBDEF<sub>ec</sub> complex.** The map of MlaBDEFab (this study) is shown in grey, overlaid to that of MlaBDEF<sub>ec</sub> (ekiert et al.) in yellow, aligned in the cytosolic domains density. The overall architecture of both complexes are similar, however MlaD appears offset by  $\sim 20^\circ$  in the *A. baumannii* complex, compared to the *E. coli* complex. It remains to be determined if this corresponds to a difference between species, or if the two structures were obtained in different states of substrate binding and/or nucleotide hydrolysis.
