# Supplementary material for: The Acinetobacter baumannii Mla system and glycerophospholipid transport to the outer membrane
Source: eLife journal article supplement (doi:10.7554/elife.40171), 2019-01-14
Supplement: supp [file elife-40171-supp-v1.zip › elife_poa_e40171_Figure_4_figure_supplement_1.pdf]

**A**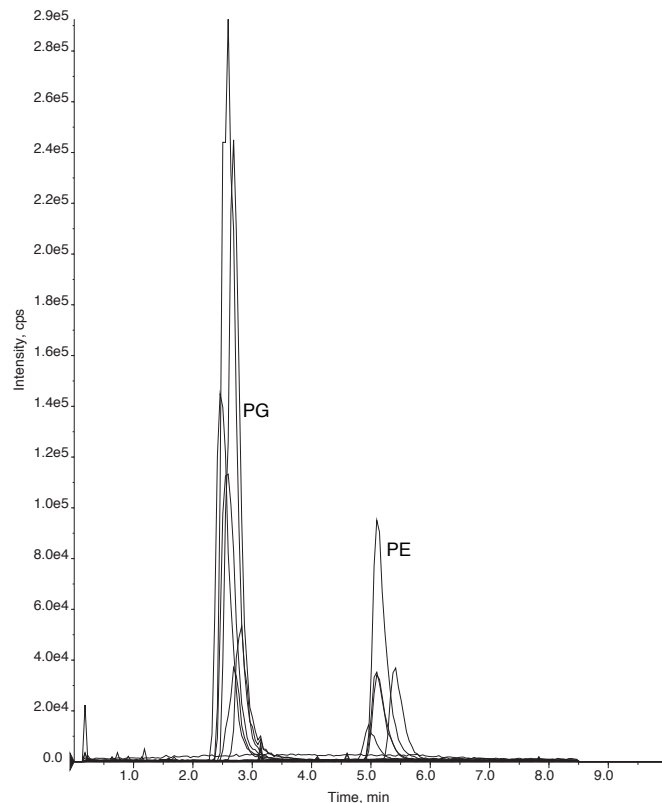**B**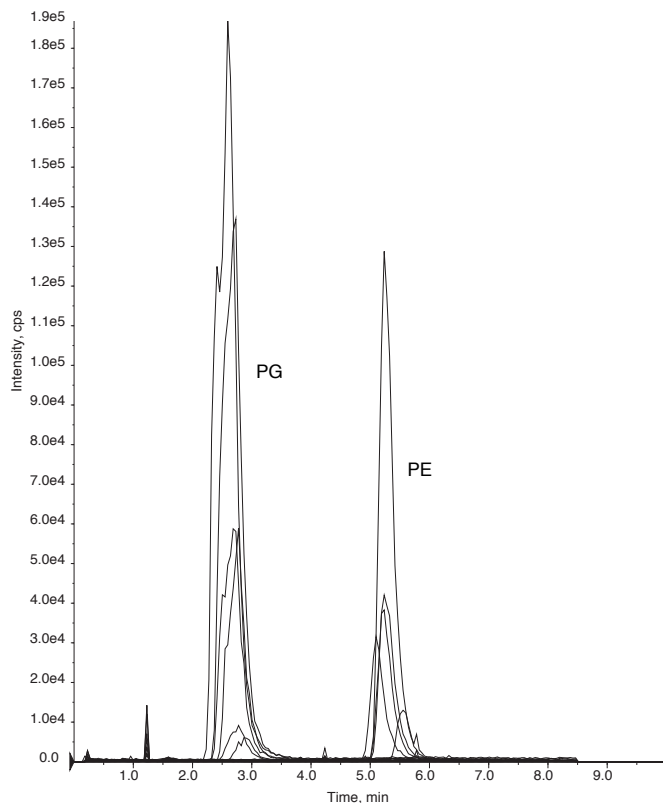

**Figure 4 - figure supplement 1. Purified periplasmic components of the Mla system remain bound to glycerophospholipids. (A)** Chromatogram of LC-MS/MS of glycerophospholipids extracted from purified MlaC. Peaks were identified based on MS and elution time. PG, phosphatidylglycerol. PE, phosphatidylethanolamine. **(B)** Chromatogram of LC-MS/MS of glycerophospholipids extracted from purified MlaD soluble domain.
