# Supplementary material for: The Acinetobacter baumannii Mla system and glycerophospholipid transport to the outer membrane
Source: eLife journal article supplement (doi:10.7554/elife.40171), 2019-01-14
Supplement: supp [file elife-40171-supp-v1.zip › elife_poa_e40171_Figure_5_figure_supplement_1.pdf]

**A**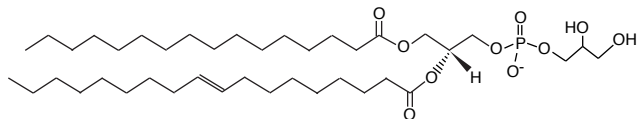

Unlabelled phosphatidylglycerol (C16:0/18:1)  
m/z 747

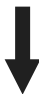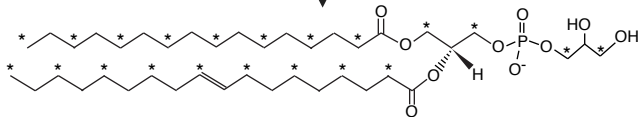

<sup>13</sup>C-labelled phosphatidylglycerol (C16:0/18:1)  
m/z 768

**B**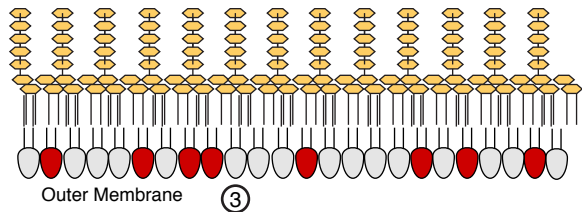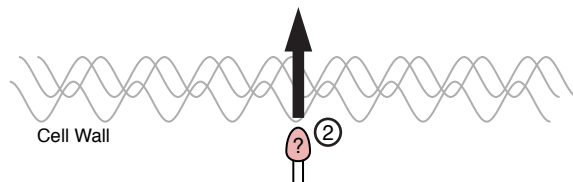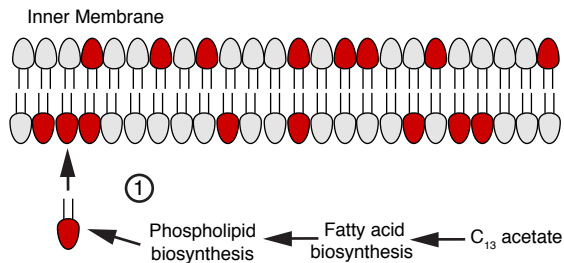

**Figure 5 - figure supplement 1. A stable isotope assay of glycerophospholipid transport from the inner membrane to the outer membrane (A)** Schematic showing an example of the shift in mass-to-charge ratio (m/z) of glycerophospholipids (GPL) following growth in 2-<sup>13</sup>C acetate. **(B)** A schematic illustrating the rationale of the stable isotope assay: (1) Newly synthesized <sup>13</sup>C-labelled GPL, shown here in red, are first inserted into the inner membrane (IM) following synthesis; (2) the likelihood that a given GPL that is trafficked from the IM to the OM will be labeled is proportional to the ratio of labeled to unlabeled GPL in the IM; (3) a comparison of the ratios of labeled to unlabeled GPL in the inner and outer membranes will therefore reflect the efficiency of GPL transport.
