# Supplementary material for: The Acinetobacter baumannii Mla system and glycerophospholipid transport to the outer membrane
Source: eLife journal article supplement (doi:10.7554/elife.40171), 2019-01-14
Supplement: supp [file elife-40171-supp-v1.zip › elife_poa_e40171_Figure_5_figure_supplement_2.pdf]

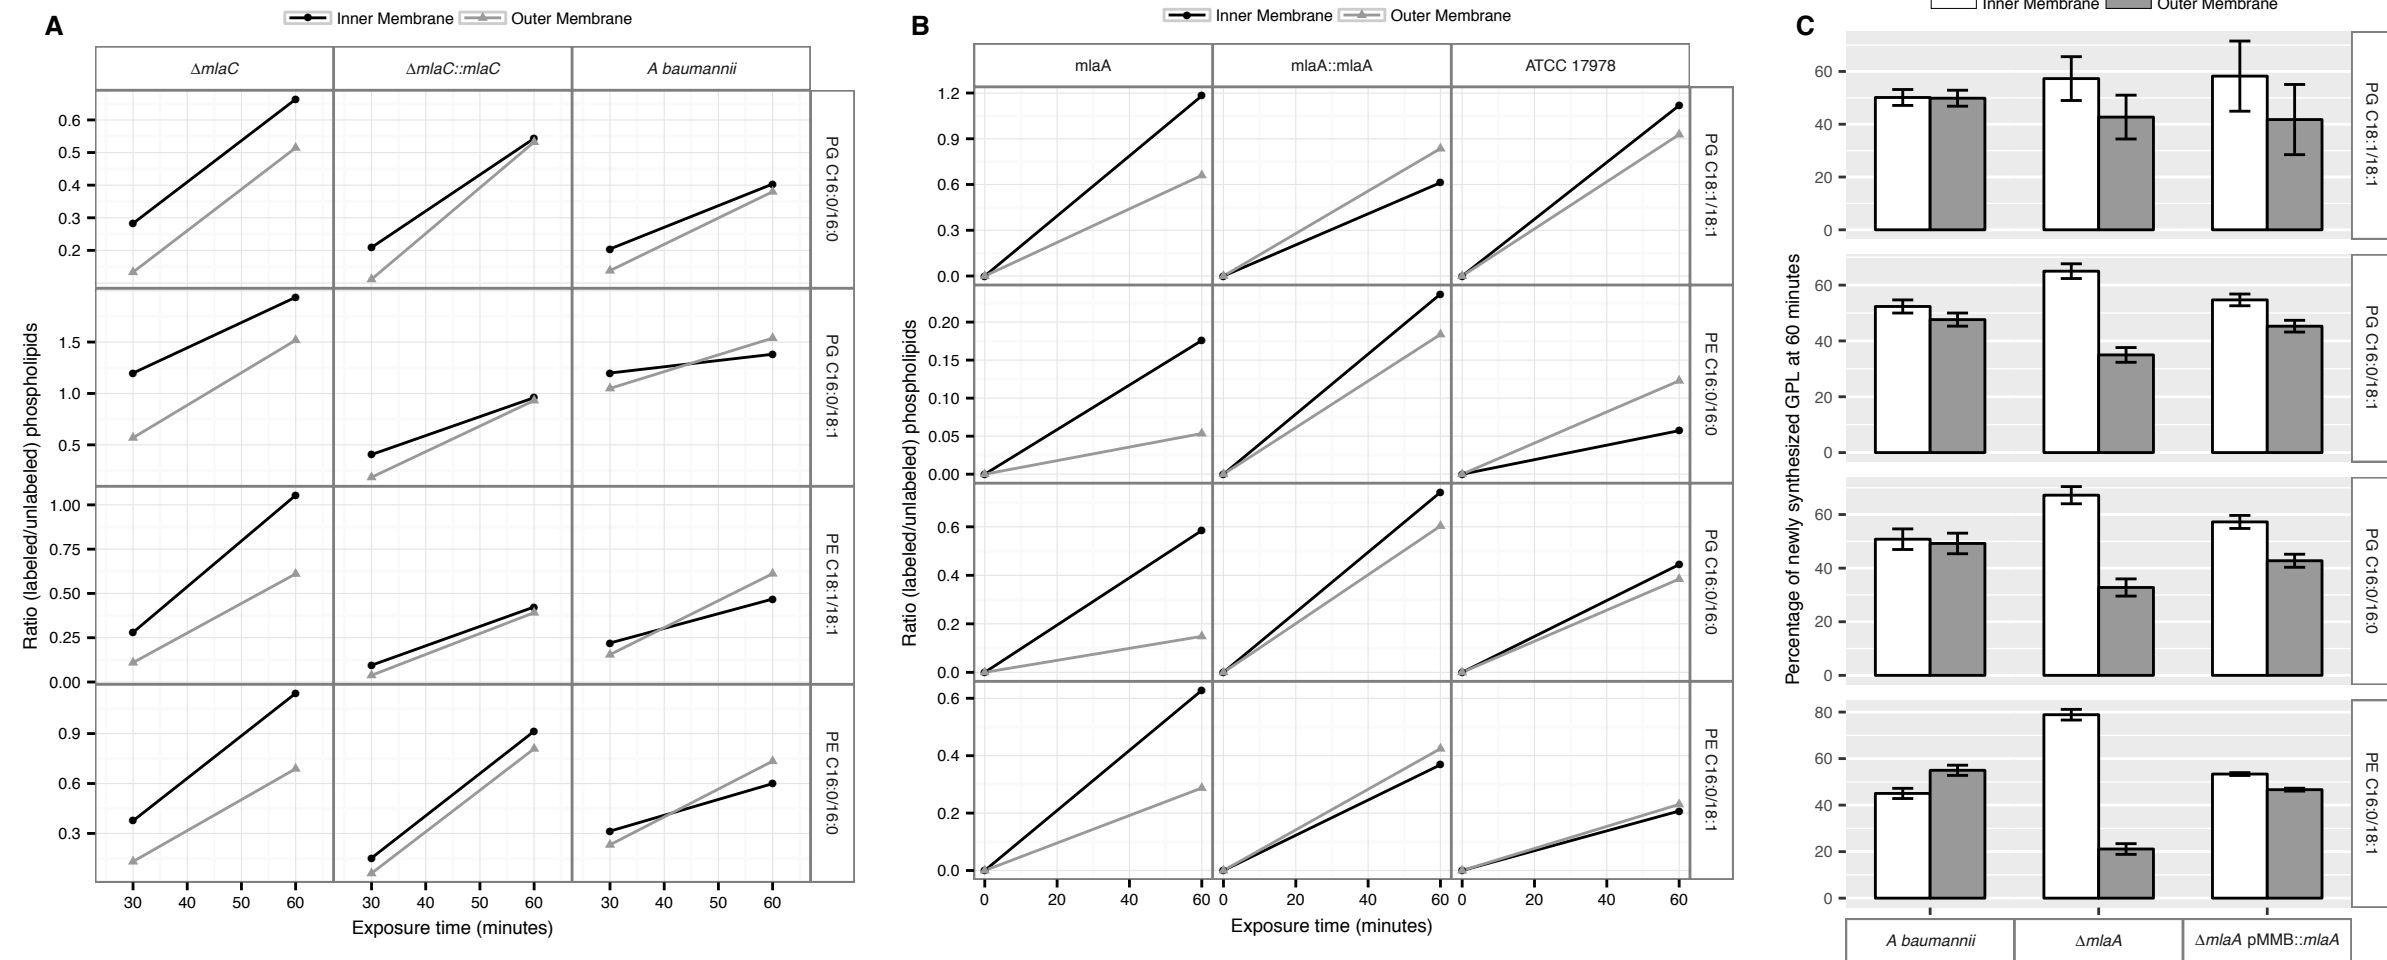

**Figure 5 - figure supplement 2. Newly synthesized glycerophospholipids accumulate at the inner membrane of MlaA mutants.** (A) LC-MS/MS quantification of  $^{13}\text{C}$  labelled/unlabelled glycerophospholipids in isolated membrane fractions over time after growth in  $2\text{-}^{13}\text{C}$  acetate in  $\Delta mlaC$  and complemented strain. Facet labels on the right indicate the specific glycerophospholipid species analyzed and the acyl chain length. PG, phosphatidylglycerol; PE, phosphatidylethanolamine. Shown is representative data from repeated experiments. (B) LC-MS/MS quantification of  $^{13}\text{C}$  labelled/unlabelled glycerophospholipids in isolated membrane fractions over time after growth in  $2\text{-}^{13}\text{C}$  acetate in  $\Delta mlaF$  and complemented strain. Facet labels on the right indicate the specific glycerophospholipid species analyzed and the acyl chain length. PG, phosphatidylglycerol; PE, phosphatidylethanolamine. Shown is representative data from repeated experiments. (C) Relative proportion of newly synthesized GPL on IM and OM after one hour growth in  $2\text{-}^{13}\text{C}$  acetate. Error bars represent  $\pm$  s.d. ( $n = 2$ ). Statistical analyses performed using a Student's t test. p-Value: \*,  $p < 0.05$ ; \*\*,  $p < 0.01$ .
