# Supplementary material for: The Acinetobacter baumannii Mla system and glycerophospholipid transport to the outer membrane
Source: eLife journal article supplement (doi:10.7554/elife.40171), 2019-01-14
Supplement: supp [file elife-40171-supp-v1.zip › elife_poa_e40171_Figure_5_figure_supplement_3.pdf]

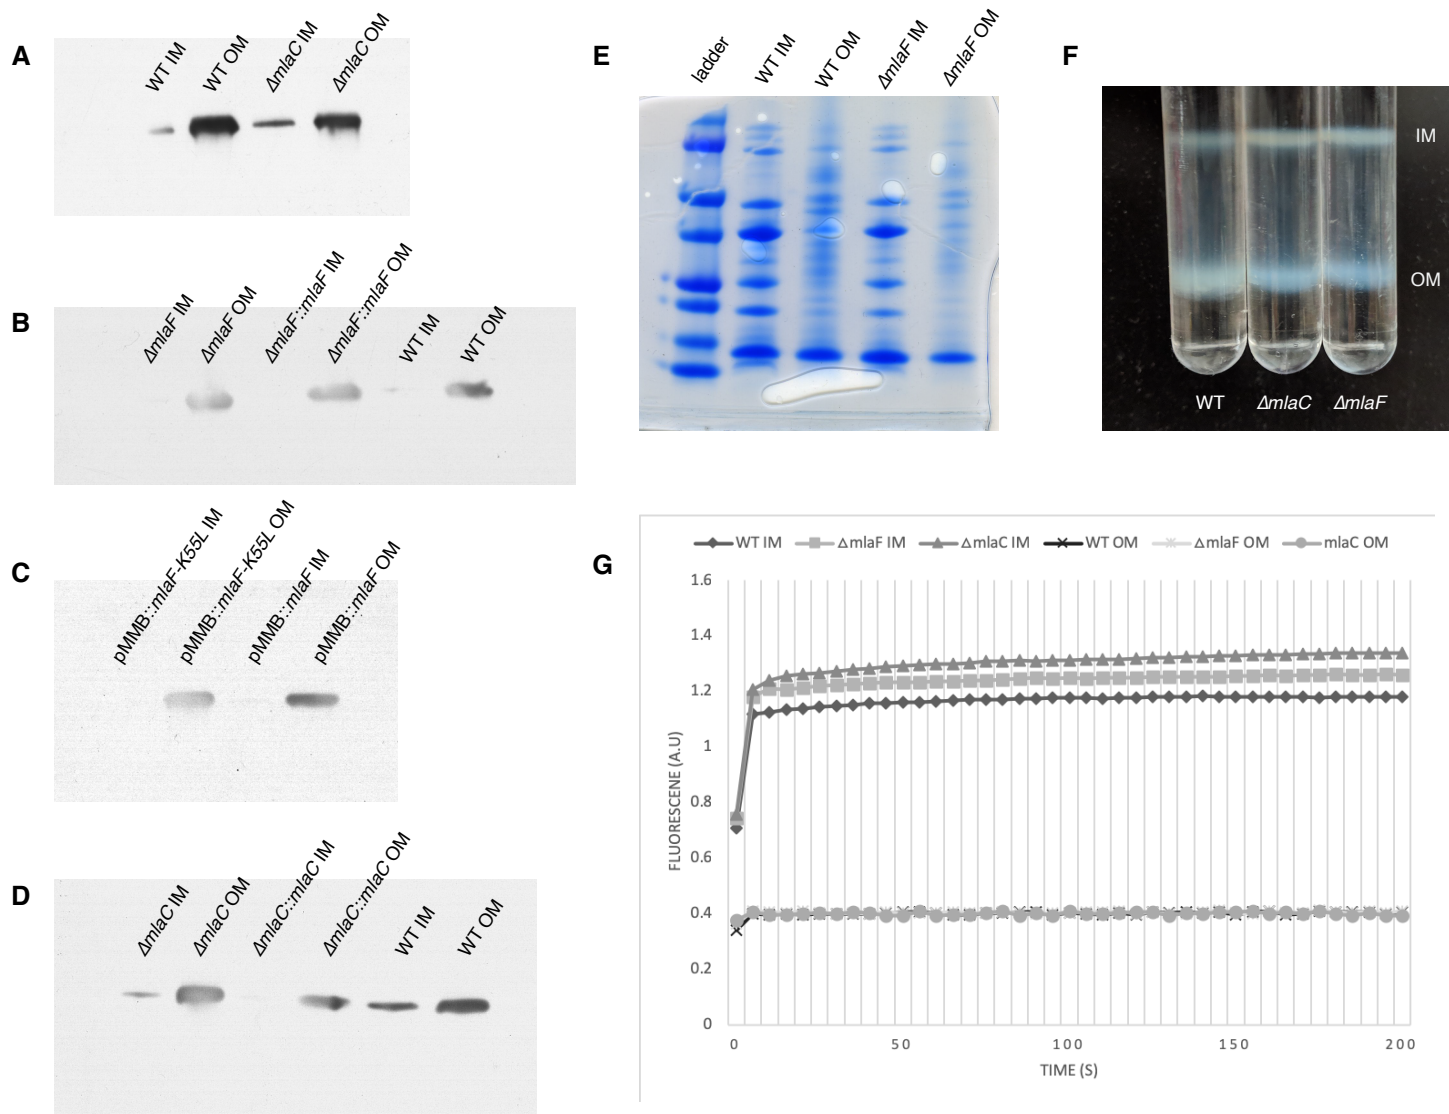

**Figure 5 - figure supplement 3. Confirmation of inner and outer membrane separation.** Each lane contains 10  $\mu$ g total protein as measured by Bradford protein assay. **(A)**  $\alpha$ -OmpA Western blot of separated membranes analyzed in Figure 4. **(B)**  $\alpha$ -OmpA Western blot of separated membranes analyzed in Figure 5A **(C)**  $\alpha$ -OmpA Western blot of separated membranes analyzed in Figure 5B. **(D)**  $\alpha$ -OmpA Western blot of separated membranes analyzed in Figure 5C. **(E)** Coomassie stained SDS-protein gel of representative isolated membrane samples alongside BioRad Precision Plus Protein Standard. **(F)** Separation of inner and outer membranes into distinct bands by 3-step sucrose gradient. **(G)** NADH assay for enzymatic activity of inner membrane.
