# Supplementary material for: The Acinetobacter baumannii Mla system and glycerophospholipid transport to the outer membrane
Source: eLife journal article supplement (doi:10.7554/elife.40171), 2019-01-14
Supplement: supp [file elife-40171-supp-v1.zip › elife_poa_e40171_Supplementary_File_1.xlsx]

## Sheet: Sheet1
Table S1: Results of transposon mutagenesis screen for genes involved in outer membrane barrier function in ATCC 17978
						Bioinformatic Predictions				Permeability		Antibiotic Susceptibility Disc Assay (mm diameter)
BLAST Result	Gene	Description	Strain	Notes	Hit Countc	SignalP	TMHMM	COG Description	COG Category	EtBr Influxa	NPN Influxb	TMP (5 mg)	RIF (5 mg)	IMP (10 mg)	CB (100 mg)	AMK (30 mg)	GNT (10 mg)	PMB (300 mg)	ERM (15 mg)
A1S_0030	ssuA1	aliphatic sulfonates-binding protein		Part of an ABC transport system required for utilization of alkanesulfonates	1			ABC-type nitrate/sulfonate/bicarbonate transport systems, periplasmic components	Inorganic ion transport and metabolism			10	13	35	30	26	25	17	20
A1S_0049	ptk	protein tyrosine kinase			2		2		Cell division and chromosome partitioning	Yes	Yes	8	10	30	21	22	23	16	20
A1S_0057		capsular polysaccharide synthesis enzyme			2			Acetyltransferase (isoleucine patch superfamily)	General function prediction only	Yes	Yes	8	12	29	27	25	24	17	21
A1S_0066		hypothetical protein			1			Phosphomannomutase	Carbohydrate transport and metabolism	Yes	Yes	8	12	27	26	24	21	15	20
A1S_0093		putative membrane protein			1		9	Predicted membrane protein	Function unknown			8	11	30	30	26	24	17	20
A1S_0127	DedA	putative integral membrane protein (DedA)			4	Yes	6	Putative threonine efflux protein	Amino acid transport and metabolism	Yes	Yes	10	20	42	28	25	25	21	18
A1S_0170	OprC	putative outer membrane copper receptor (OprC)			1							8	14	33	28	21	20	17.5	19
A1S_0230		phosphoglycerate mutase III cofactor independent			1			Phosphoglyceromutase	Carbohydrate transport and metabolism			8	15	38	36	35	30	20	22
A1S_0255	tolC	type I secretion outer membrane protein			1	Yes	2	Outer membrane protein	Cell envelope biogenesis, outer membrane / Intracellular trafficking and secretion	Yes		13	12	32	25	23	23	15	18
A1S_0256		high affinity phosphate uptake transcriptional repressor	Wildtype - Screened first, before phoU deletion		8			Phosphate uptake regulator	Inorganic ion transport and metabolism			12	13	32	26	25	23	18	21
A1S_0335		transcription termination/antitermination L factor			1			Transcription elongation factor	Transcription	Yes		8	8	25	8	22	20	16	8
A1S_0439		DNA topoisomerase type I omega protein			2	Yes		Topoisomerase IA	DNA replication, recombination, and repair	Yes		8	12	28.5	26	25	23	15.5	20
A1S_0477		ATP-dependent Clp protease ATP-binding subunit			3			ATP-dependent protease Clp, ATPase subunit	Posttranslational modification, protein turnover, chaperones	Yes	Yes	12	15	43	35	34	32	18	29
A1S_0612		DNA polymerase I			2			DNA polymerase I - 3'-5' exonuclease and polymerase domains	DNA replication, recombination, and repair	Yes	Yes	12	14	33	33	30	27	17	23
A1S_0623		DNA mismatch repair enzyme			1			DNA mismatch repair enzyme (predicted ATPase)	DNA replication, recombination, and repair			8	11	29	24	25	23	16	21
A1S_0643		hypothetical protein			1			Tfp pilus assembly protein, pilus retraction ATPase PilT	Cell motility and secretion / Intracellular trafficking and secretion		Yes	8	12	32	27.5	28	27	17	22
A1S_0836	tadD	putative signal peptide			1					Yes	Yes	8	13	31	26	25	22	17.5	23
A1S_0976		hypothetical protein			2	Yes		Uncharacterized conserved protein	Function unknown			16	18	43	27	27	27	22	20
A1S_0999		hypothetical protein		MH29	1	Yes				Yes	Yes	8	17	37	27	28	28	17	22
A1S_1054		hypothetical protein			1			Ribonuclease HI	DNA replication, recombination, and repair			8	13	29	27	26	25	17.5	23
A1S_1190		aspartate carbamoyltransferase catalytic subunit			4			Aspartate carbamoyltransferase, catalytic chain	Nucleotide transport and metabolism			8	12	33	27	26	23	19.5	18
A1S_1191	pyrX	Dihydroorotase-like protein			5			Dihydroorotase and related cyclic amidohydrolases	Nucleotide transport and metabolism	Yes		8	15	40	34	30	26	22	20
A1S_1192		Dihydroorotase-like protein			2			Dihydroorotase and related cyclic amidohydrolases	Nucleotide transport and metabolism			8	15	39	34	30	18	21	23
A1S_1225		Peptidase S24 S26A			2			Predicted transcriptional regulator	Transcription	Yes	Yes	8	10	35	26	22	21	18	16
A1S_1421		malonate decarboxylase alpha subunit	Wildtype - Screened first, before phoU deletion		1			Acyl CoA:acetate/3-ketoacid CoA transferase	Lipid metabolism			10	15	31	24	22	22	15	19
A1S_1453	pgk	phosphoglycerate kinase			1			3-phosphoglycerate kinase	Carbohydrate transport and metabolism			8	11	33	30	26	22	17	18
A1S_1542	maf2	putative Maf-like protein			1			Nucleotide-binding protein implicated in inhibition of septum formation	Cell division and chromosome partitioning			11	18	40	25	24	25	20	23
A1S_1543		phosphoglycerate kinase			1			3-phosphoglycerate kinase	Carbohydrate transport and metabolism			8	11	33	30	26	22	17	18
A1S_1575		orotidine-5'-phosphate decarboxylase			4			Orotidine-5'-phosphate decarboxylase	Nucleotide transport and metabolism			8	15	39	37	28	26	20	18
A1S_1769		Putative RND family drug transporter (outer membrane efflux protein)			1	Yes		Outer membrane protein	Cell envelope biogenesis, outer membrane / Intracellular trafficking and secretion	Yes		11	16	40	26	24	23	20	18
A1S_1968	skp	putative outer membrane protein (OmpH)			1	Yes	1	Outer membrane protein	Cell envelope biogenesis, outer membrane			8	25	36	29	26	26	19	20
A1S_2093		Hypothetical protein			1					Yes		10	12	32	28	25	22	16	20
A1S_2113		delta(2)-isopentenylpyrophosphate tRNA-adenosine transferase			1			tRNA delta(2)-isopentenylpyrophosphate transferase	Translation, ribosomal structure and biogenesis			8	10	31	23	22	20	17	20
A1S_2114		methyl-directed mismatch repair enzyme			1							8	15	34	33	28	28	19	20
A1S_2213	CsuE			MH10	1	Yes	2	P pilus assembly protein, porin PapC	Cell motility and secretion / Intracellular trafficking and secretion			8	14	29	25	25	23	17	18
A1S_2214	CsuD	Pilus assembly protein			1	Yes		P pilus assembly protein, porin PapC	Cell motility and secretion / Intracellular trafficking and secretion	Yes		8	11.5	35	27	25	23	16	22
A1S_2400		hypothetical protein (AIS_2400 metal-dependent hydrolase domain-containing protein)			1		2	Predicted metal-dependent hydrolase	General function prediction only			16	20	40	25	25	25	21	23
A1S_2448		putative phosphate transporter	Wildtype - Screened first, before phoU deletion		2	Yes		ABC-type phosphate transport system, periplasmic component	Inorganic ion transport and metabolism			13	19	42	23	26	26	24	17
A1S_2501		glyceraldehyde-3-phosphate dehydrogenase			2			Glyceraldehyde-3-phosphate dehydrogenase/erythrose-4-phosphate dehydrogenase	Carbohydrate transport and metabolism			8	14	28	29	28	25	21	20
A1S_2604	PerM	putative permease (PerM family)			5		10	Predicted permease, member of the PurR regulon	General function prediction only			8	10	32	24	23	22	16	20
A1S_2686	carA	carbamoyl-phosphate synthase small chain			2			Carbamoylphosphate synthase small subunit	Amino acid transport and metabolism / Nucleotide transport and metabolism			8	16	39	40	41	38	22	31
A1S_2687	carB	carbamoyl-phosphate synthase large subunit			4			Carbamoylphosphate synthase large subunit	Amino acid transport and metabolism / Nucleotide transport and metabolism			8	14.5	28	28	24	24	19	18
A1S_2697	cobA	multifunctional protein			3			Uroporphyrinogen-III methylase	Coenzyme metabolism			10	20	48	23	23	23	21	12
A1S_2722		putative membrane protein	Wildtype - Screened first, before phoU deletion		1		1	Predicted metalloprotease	General function prediction only			8	11	29	23	22	22	16	17
A1S_2724		putative hemagglutinin/hemolysin-related protein	Wildtype - Screened first, before phoU deletion		2							8	13	29	25	24	22	17.5	18
A1S_2768	uppP	bacitracin resistance protein	Wildtype - Screened first, before phoU deletion		5		7	Undecaprenyl pyrophosphate phosphatase	Lipid transport and metabolism			8	18	40	24	25	25	20	23
A1S_2845		hypothetical protein			1			Uncharacterized protein conserved in bacteria	Function unknown			8	19	48	29	28	23	22	22
A1S_2846		CysI-like sulfite reductase protein			1							8	12	31	26	25	23	18	20
A1S_2847		glucose dehydrogenase			1	Yes	6	Glucose dehydrogenase	Carbohydrate transport and metabolism			10	19	46	26	24	25	22	11
A1S_3102	mlaE	toluene tolerance efflux transporter			2		5	ABC-type transport system involved in resistance to organic solvents, permease component	Secondary metabolites biosynthesis, transport, and catabolism	Yes	Yes	12	19	40	22	25	24	19	20
A1S_3103	mlaF	toluene tolerance efflux transporter			2			ABC-type transport system involved in resistance to organic solvents, ATPase component	Secondary metabolites biosynthesis, transport, and catabolism	Yes	Yes	8	14	32	26	24	22	16	23
A1S_3211		amino acid permease			1		12	Amino acid transporters	Amino acid transport and metabolism			8	11	30	28	26	25	16.5	21
A1S_3340	pyrE	orotate phosphoribosyltransferase			1			Orotate phosphoribosyltransferase	Nucleotide transport and metabolism	Yes		8	8	24	8	22	21	15	8
A1S_3436		putative alcohol dehydrogenase	Wildtype - Screened first, before phoU deletion		1			Zn-dependent alcohol dehydrogenases	General function prediction only			8	11	29	23	22	21	15	18
A1S_3475		TonB-dependent receptor protein			1	Yes		Outer membrane receptor proteins	Inorganic ion transport and metabolism	Yes		10	13	37	28	26	27	17	21
A1S_3478		hypothetical protein			1			Uncharacterized protein conserved in bacteria	Function unknown			8	12.5	32	29	25	24	17	21
AS1_3612		HNH endonuclease			1					Yes		12	23	50	30	28	25	22	22
pCP000521_007895		hypothetical protein			3					Yes		8	11	30	26	24	23	16	19
ATCC 17978 (wild type)												8	9.5	27	25	21	21.5	15	19
aEtBr Influx: Ethidium bromide test for outer membrane permeability						TMP: Trimethoprim, RIF: Rifampicin, IMP: Imipenem, CB: Carbenicillin, AMK: Amikacin, GNT: Gentamicin, PMB: Polymyxin B, ERM: Erythromycin
bNPN Influx: 1-N-phenylnaphthylamine test of membrane permeability
cHit Count: number of transposon insertions obtained within open reading frame
