# Supplementary material for: The Acinetobacter baumannii Mla system and glycerophospholipid transport to the outer membrane
Source: eLife journal article supplement (doi:10.7554/elife.40171), 2019-01-14
Supplement: supp [file elife-40171-supp-v1.zip › elife_poa_e40171_Supplementary_File_2.xlsx]

## Sheet: Sheet1
Table S2: Accumulation of newly synthesized glycerophospholipids in A. baumannii inner and outer membranes
				Ratio of 13C-labeled GPL to unlabelled GPLb
Replicatea	Strain	Membrane	Time (min)	`PG C18:1/18:1`	`PG C16:0/18:1`	`PG C16:0/16:0`	`PE C18:1/18:1`	`PE C16:0/18:1`	`PE C16:0/16:0`
A	WT	Inner Membrane	30	NA	0.0874101	0.0620513	NA	0.274026	NA
A	WT	Outer Membrane	30	NA	0.0697627	0.0614247	NA	0.206402	NA
A	WT	Inner Membrane	60	NA	0.28493	0.116474	NA	0.763896	NA
A	WT	Outer Membrane	60	NA	0.251689	0.0921538	NA	0.634634	NA
A	△mlaC	Inner Membrane	30	NA	0.105581	0.0450675	NA	0.269206	NA
A	△mlaC	Outer Membrane	30	NA	0.0636637	0.0297849	NA	0.136821	NA
A	△mlaC	Inner Membrane	60	NA	0.386807	0.100952	NA	1.03437	NA
A	△mlaC	Outer Membrane	60	NA	0.235398	0.0702857	NA	0.609435	NA
B	WT	Inner Membrane	30	0.264407	0.117149	0.109626	NA	0.383855	NA
B	WT	Outer Membrane	30	0.222642	0.0823009	0.100763	NA	0.278435	NA
B	WT	Inner Membrane	60	0.358772	0.446503	0.346957	NA	0.894973	NA
B	WT	Outer Membrane	60	0.335435	0.426371	0.333654	NA	1.03713	NA
B	△mlaC	Inner Membrane	30	0.122703	0.084375	0.0661677	NA	0.216633	NA
B	△mlaC	Outer Membrane	30	0.161905	0.0809362	0.0834416	NA	0.159648	NA
B	△mlaC	Inner Membrane	60	0.39375	0.664766	0.487578	NA	1.33616	NA
B	△mlaC	Outer Membrane	60	0.297321	0.474982	0.308157	NA	0.839412	NA
C	WT	Outer Membrane	30	1.09524	0.137876	0.428351	1.04937	0.154483	0.231742
C	WT	Inner Membrane	30	1.45486	0.187037	0.57712	1.17391	0.223197	0.298479
C	△mlaC	Inner Membrane	30	1.52632	0.282668	0.674221	1.19821	0.279849	0.375887
C	△mlaC	Outer Membrane	30	0.784722	0.133178	0.34669	0.569094	0.109412	0.130804
C	△mlaC::mlaC	Inner Membrane	30	1.625	0.208999	0.8463	0.405556	0.0945479	0.152226
C	△mlaC::mlaC	Outer Membrane	30	0.821895	0.111405	0.441406	0.184659	0.0377892	0.060241
C	WT	Inner Membrane	60	1.29911	0.403448	0.87632	1.38138	0.468293	0.599278
C	WT	Outer Membrane	60	1.37363	0.379994	0.903785	1.53846	0.611661	0.734177
C	△mlaC	Inner Membrane	60	1.73364	0.663395	1.2422	1.93567	1.05405	1.14198
C	△mlaC	Outer Membrane	60	1.48444	0.514553	1.01997	1.51839	0.610413	0.688679
C	△mlaC::mlaC	Inner Membrane	60	2.78857	0.543388	1.99762	0.95935	0.423472	0.913876
C	△mlaC::mlaC	Outer Membrane	60	2.42308	0.532311	1.81899	0.931624	0.391538	0.808824
D	WT	Inner Membrane	30	0.842697	0.15511	0.458468	0.736908	0.157317	0.314286
D	WT	Outer Membrane	30	0.504654	0.0903797	0.299539	0.472222	0.0783029	0.145175
D	WT	Inner Membrane	30	0.743633	0.141589	0.411667	0.745763	0.156809	0.297226
D	△mlaC	Inner Membrane	30	0.768421	0.150409	0.307767	0.727027	0.167935	0.389937
D	△mlaC	Outer Membrane	30	0.418605	0.069743	0.191589	0.2992	0.059519	0.132053
D	△mlaC::mlaC	Inner Membrane	30	0.836478	0.200168	0.663063	0.344348	0.134415	0.174629
D	△mlaC::mlaC	Outer Membrane	30	0.507042	0.100645	0.324476	0.151781	0.0426376	0.0522613
D	WT	Inner Membrane	60	1.02755	0.262968	0.82069	0.937143	0.281919	0.75
D	WT	Outer Membrane	60	0.934615	0.266096	0.84555	0.971154	0.322575	0.884146
D	△mlaC	Inner Membrane	60	1.0199	0.318942	0.676568	1.16203	0.490943	1.10145
D	△mlaC	Outer Membrane	60	0.884211	0.203678	0.727273	0.981132	0.400956	0.902516
D	△mlaC::mlaC	Inner Membrane	60	1.63701	0.457436	1.38739	0.717842	0.291215	0.789855
D	△mlaC::mlaC	Outer Membrane	60	1.59113	0.380785	1.35284	0.681679	0.289185	0.795222
E	WT	Inner Membrane	30	0.134752	0.0851229	0.139414	NA	0.263113	NA
E	WT	Outer Membrane	30	0.139683	0.0820426	0.128137	NA	0.236769	NA
E	WT	Inner Membrane	60	0.224595	0.64471	0.823529	NA	0.920447	NA
E	WT	Outer Membrane	60	0.236885	0.635907	0.746575	NA	1.00589	NA
E	WT	Inner Membrane	30	0.138067	0.0840376	0.131833	NA	0.259588	NA
E	WT	Outer Membrane	30	0.121277	0.0819691	0.126535	NA	0.237022	NA
E	WT	Inner Membrane	60	0.233115	0.653647	0.762447	NA	0.903054	NA
E	WT	Outer Membrane	60	0.218022	0.636565	0.805211	NA	0.960884	NA
E	△mlaF::mlaF	Inner Membrane	30	0.154016	0.179897	0.129412	NA	0.322993	NA
E	△mlaF::mlaF	Outer Membrane	30	0.134979	0.162695	0.125272	NA	0.293997	NA
E	△mlaF::mlaF	Inner Membrane	60	0.256281	0.732272	0.51215	NA	0.857513	NA
E	△mlaF::mlaF	Outer Membrane	60	0.232867	0.674678	0.471239	NA	0.938539	NA
E	△mlaF::mlaF	Inner Membrane	30	0.154054	0.176217	0.15	NA	0.314013	NA
E	△mlaF::mlaF	Outer Membrane	30	0.128743	0.161277	0.107935	NA	0.293467	NA
E	△mlaF::mlaF	Inner Membrane	60	0.257029	0.697782	0.518072	NA	0.863915	NA
E	△mlaF::mlaF	Outer Membrane	60	0.239426	0.663497	0.448062	NA	0.904366	NA
E	△mlaF	Inner Membrane	30	0.242373	0.174033	0.137143	NA	0.435484	NA
E	△mlaF	Outer Membrane	30	0.148974	0.101106	0.0591568	NA	0.179337	NA
E	△mlaF	Inner Membrane	60	0.45122	1.15693	0.712302	NA	2.17515	NA
E	△mlaF	Outer Membrane	60	0.339535	0.725884	0.420732	NA	0.879456	NA
E	△mlaF	Inner Membrane	30	0.229661	0.180068	0.133051	NA	0.3946	NA
E	△mlaF	Outer Membrane	30	0.14955	0.0950482	0.0575791	NA	0.165552	NA
E	△mlaF	Inner Membrane	60	0.449573	1.11657	0.750405	NA	2.12065	NA
E	△mlaF	Outer Membrane	60	0.336406	0.702723	0.425879	NA	0.929825	NA
E	WT	Inner Membrane	30	0.262544	0.10637	0.109804	NA	0.344545	NA
E	WT	Outer Membrane	30	0.216867	0.0756098	0.0881356	NA	0.243384	NA
E	WT	Inner Membrane	60	0.335762	0.476703	0.343373	NA	0.878453	NA
E	WT	Outer Membrane	60	0.337563	0.430885	0.34188	NA	1.01932	NA
F	△mlaF	Inner Membrane	20	0.893987	0.0687837	0.0691511	0.495413	0.0876258	0.0256299
F	△mlaF	Inner Membrane	40	1.62229	0.118495	0.169153	1.25664	0.202949	0.134868
F	△mlaF	Inner Membrane	60	1.82692	0.177788	0.339568	1.48582	0.339166	0.273333
F	△mlaF::mlaF	Inner Membrane	20	0.638235	0.0395833	0.0508824	0.277778	0.0434671	0.0184397
F	△mlaF::mlaF	Inner Membrane	40	1.52632	0.0853412	0.109811	0.96319	0.115262	0.101134
F	△mlaF::mlaF	Inner Membrane	60	1.47208	0.0845696	0.137072	1.07059	0.127386	0.115385
F	△mlaF::mlaF	Inner Membrane	20	0.632576	0.045637	0.0616541	0.278488	0.042614	0.0176978
F	△mlaF::mlaF	Inner Membrane	40	1.475	0.0923994	0.152174	0.905172	0.119204	0.102284
F	△mlaF::mlaF	Inner Membrane	60	1.30583	0.106425	0.0969828	1.01266	0.129476	0.104703
F	△mlaF	Outer Membrane	20	0.303448	0.0237397	0.0202966	0.2102	0.025435	0.00741739
F	△mlaF	Outer Membrane	40	1.12121	0.0643617	0.0759563	0.731313	0.0824417	0.0504728
F	△mlaF	Outer Membrane	60	1.10336	0.0826786	0.148515	0.903846	0.102348	0.0811388
F	△mlaF::mlaF	Outer Membrane	20	0.225683	0.0153997	0.0316102	0.0873223	0.0110917	0.00466364
F	△mlaF::mlaF	Outer Membrane	40	1.45062	0.082846	0.139496	0.638249	0.0766292	0.0585938
F	△mlaF	Inner Membrane	60	1.99166	0.171606	0.369106	1.34538	0.339316	0.280952
F	△mlaF	Inner Membrane	60	1.94373	0.179688	0.310561	1.41463	0.353722	0.224654
F	△mlaF::mlaF	Outer Membrane	60	1.23729	0.0825532	0.126644	0.867089	0.112016	0.101724
G	pMMB::empty	Inner Membrane	20	0.694444	0.0841095	0.102935	0.521542	0.104308	0.0394299
G	pMMB::empty	Inner Membrane	40	1.35573	0.172134	0.199507	0.997386	0.27543	0.140741
G	pMMB::mlaFK55L	Inner Membrane	20	0.2875	0.0277548	0.26025	0.0960707	0.0263285	0.0482301
G	pMMB::mlaFK55L	Inner Membrane	40	1.34545	0.186826	0.570724	0.990458	0.264506	0.562585
G	pMMB::empty	Inner Membrane	20	0.745721	0.0835165	0.1	0.472477	0.103635	0.0392114
G	pMMB::empty	Inner Membrane	40	1.4108	0.175025	0.215512	1.01515	0.268131	0.133981
G	pMMB::mlaFK55L	Inner Membrane	20	0.292268	0.0298557	0.263527	0.0885965	0.0253809	0.0518851
G	pMMB::mlaFK55L	Inner Membrane	40	1.37793	0.167468	0.508411	0.930435	0.265209	0.517007
G	pMMB::empty	Outer Membrane	20	0.729246	0.060958	0.109018	0.217647	0.0524528	0.0189759
G	pMMB::empty	Outer Membrane	40	1.43369	0.160514	0.213423	0.92449	0.235433	0.131881
G	pMMB::mlaFK55L	Outer Membrane	20	0.0183104	0.00705336	0.112129	0.0157948	0.00633071	0.014422
G	pMMB::mlaFK55L	Outer Membrane	40	1.14402	0.150323	0.34141	0.601093	0.111532	0.20695
H	pMMB::mlaF	Inner Membrane	20	0.231933	0.0364672	0.0777969	0.183888	0.055206	0.0395604
H	pMMB::mlaF	Inner Membrane	40	0.455752	0.0956522	0.202407	0.535088	0.161955	0.187611
H	pMMB::mlaF	Inner Membrane	60	0.450935	0.126297	0.308673	0.592932	0.2	0.239224
H	pMMB::mlaFK55L	Inner Membrane	20	0.335463	0.0536337	0.113423	0.301316	0.0823338	0.0630392
H	pMMB::mlaFK55L	Inner Membrane	40	0.509848	0.118939	0.219844	0.534173	0.249217	0.244177
H	pMMB::mlaFK55L	Inner Membrane	60	0.523846	0.20897	0.309524	0.709278	0.470494	0.379048
H	pMMB::mlaF	Outer Membrane	20	0.119976	0.0193807	0.0520362	0.0870044	0.0230866	0.0182812
H	pMMB::mlaF	Outer Membrane	40	0.314667	0.0684135	0.155215	0.475124	0.119849	0.152797
H	pMMB::mlaF	Outer Membrane	60	0.429778	0.106622	0.287411	0.564972	0.185024	0.230172
H	pMMB::mlaFK55L	Outer Membrane	20	0.186957	0.0300667	0.06	0.125714	0.0299029	0.0201724
H	pMMB::mlaFK55L	Outer Membrane	40	0.335032	0.0818578	0.171077	0.384615	0.128508	0.136299
H	pMMB::mlaFK55L	Outer Membrane	60	0.35402	0.12569	0.248684	0.463731	0.223622	0.211392
aReplicate: Indicates biological replicate experiment sets for which data was simultaneously collected for the representative strains.
bNA indicates data not collected through MRM
